# Supplementary material for: Circadian control of hepatitis B virus replication
Source: PubMed Central journal article supplement (PMC7955118; doi:10.1038/s41467-021-21821-0), 2021-03-12
Supplement: 41467_2021_21821_MOESM1_ESM.pdf [file 41467_2021_21821_MOESM1_ESM.pdf]

Supplementary Information

**Circadian control of hepatitis B virus replication**

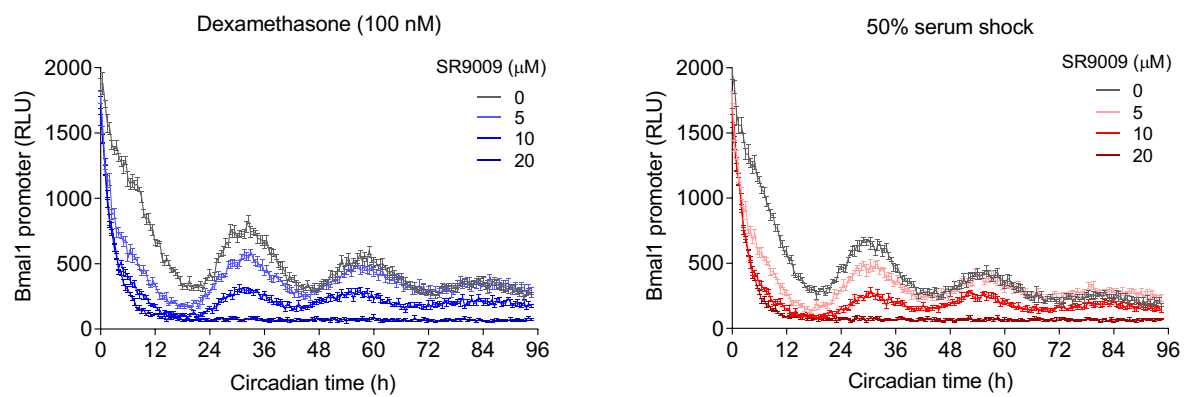

**Supplementary Fig.1: Synchronization of HepaRG cells.**

HepaRG cells stably expressing Bmal1 promoter luciferase reporter were synchronized with dexamethasone at 100 nM or 50% FBS for 2h. After removal of dexamethasone or FBS, cells were cultured in media containing live substrate in the presence of an increasing dose of REV-ERB agonist SR9009. Live luciferase signal was monitored at 30 min intervals for 96h. Data are expressed as the mean relative light units (RLU)  $\pm$  S.E.M., n = 6. Source data are provided as a Source Data file.

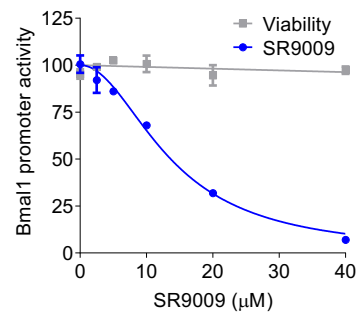

**Supplementary Fig.2: REV-ERB agonist SR9009 inhibits Bmal1 promoter activity without cytotoxicity.** HepaRG cells stably expressing Bmal1-luciferase promoter were treated with SR9009 for 48h and luciferase activity measured. Cytotoxicity was determined using an LDH assay (mean  $\pm$  S.E.M., n = 3). Source data are provided as a Source Data file.

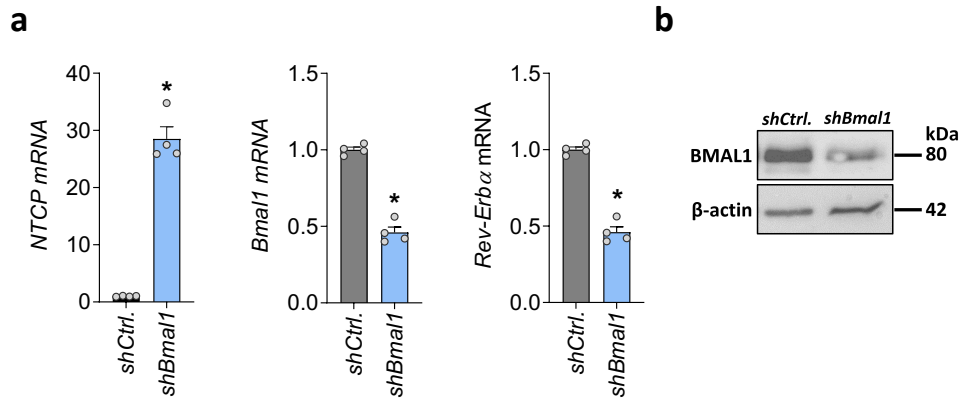

**Supplementary Fig.3: Silencing BMAL1 increases NTCP transcripts.**

**(a)** Total RNA was extracted from control or *Bmal1* silenced HepaRG cells and *NTCP*, *Bmal1* and *Rev-Erbα* mRNA levels measured by qRT-PCR. Data are expressed relative to control (mean  $\pm$  S.E.M., n = 4, Mann–Whitney test, Two-sided). **(b)** *Bmal1* silencing was validated by western blotting. \* denotes  $p < 0.05$ . Source data are provided as a Source Data file.

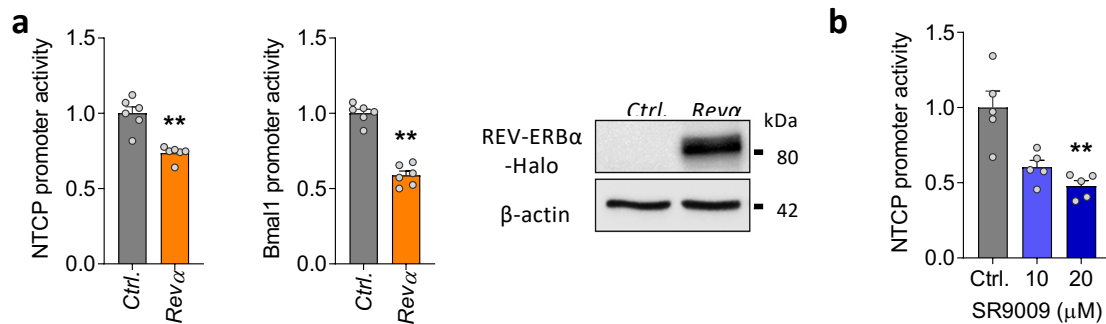

**Supplementary Fig.4: REV-ERB $\alpha$  as a repressor of NTCP promoter activity.**

**(a)** Huh-7.5 hepatoma cells were co-transfected with NTCP or Bmal1 promoter luciferase reporters with control or *Rev-Erb $\alpha$*  (Halo-tagged) expression plasmid. Promoter activities were determined 48h later by quantifying luciferase activity. Data are expressed relative to control (mean  $\pm$  S.E.M., n = 6, Mann–Whitney test, Two-sided). REV-ERB $\alpha$  overexpression was validated by western blotting using an anti-Halo antibody. **(b)** Huh-7.5 hepatoma cells were transfected with NTCP promoter luciferase reporter for 48h and treated with SR9009 for 24h and promoter activity determined by quantifying luciferase activity. Data are expressed relative to control treatment (mean  $\pm$  S.E.M., n = 5, Kruskal–Wallis ANOVA with Dunn’s test). \* denotes p < 0.05, \*\* < 0.01. Source data are provided as a Source Data file.

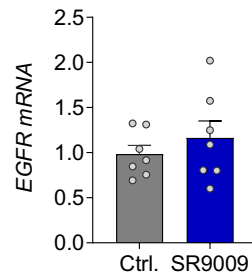

**Supplementary Fig.5: REV-ERB agonist SR9009 does not regulate EGFR mRNA.**

Differentiated HepaRG cells were treated with SR9009 (20  $\mu$ M) for 24h and *EGFR* RNA measured by qRT-PCR (mean  $\pm$  S.E.M., n = 7, Mann–Whitney test). Source data are provided as a Source Data file.

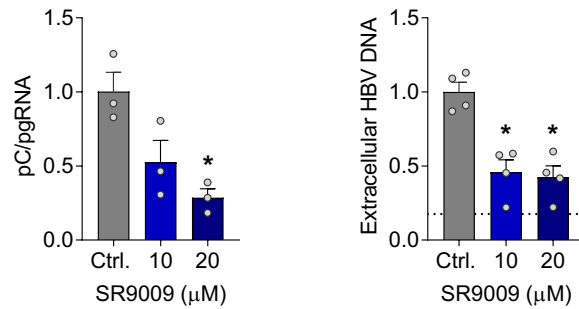

**Supplementary Fig.6: REV-ERB agonist SR9009 treatment reduces HBV pC/pgRNA levels and extracellular HBV DNA.**

HepG2.215 cells were treated with SR9009 for 48h and pC/gRNA levels determined by qRT-PCR. Data are expressed relative to untreated (Ctrl) cells (Mean ± S.E.M., n = 3, Kruskal–Wallis ANOVA with Dunn’s test). Extracellular HBV DNA levels were determined by qPCR. The reverse transcriptase inhibitor Entecavir (ETV, 1 μM) was included as positive control. Data are expressed relative to untreated (Ctrl) cells (Mean ± S.E.M., n = 4, Kruskal–Wallis ANOVA with Dunn’s test). \* denotes p < 0.05. Source data are provided as a Source Data file.

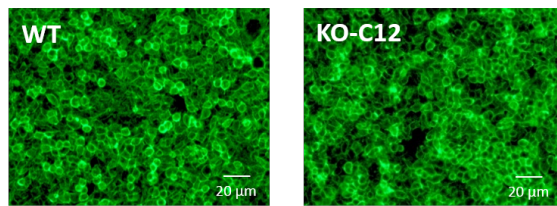

**Supplementary Fig.7: NTCP expression in wild type and Rev-Erb $\alpha$  knockout HepG2 cells.**

Parental (WT) or *Rev-Erb $\alpha$*  KO (C12) HepG2-NTCP cells were stained with Alexa 488 fluorophore labelled Mycludex B (200 nM) and images acquired using a Zeiss fluorescence microscopy. Representative fluorescent images were shown (n = 3 for each cell line)



| E-box | Position  | Sequence (CANNTG) | Genome location             |
|-------|-----------|-------------------|-----------------------------|
| 1     | 597-602   | CACCTG            | S/ POLYMERASE (RT)          |
| 2     | 689-694   | CATTTG            | S / POLYMERASE (RT)         |
| 3     | 1179-1184 | CAAGTG            | POLYMERASE (RNASE H)        |
| 4     | 1397-1402 | CAACTG            | POLYMERASE (RNASE H) / X    |
| 5     | 1566-1571 | CATCTG            | POLYMERASE (RNASE H) / X    |
| 6     | 2306-2311 | CAAATG            | CORE / POLYMERASE (TP)      |
| 7     | 2630-2635 | CAATTG            | POLYMERASE (TP)             |
| 8     | 2901-2906 | CAGTTG            | POLYMERASE (SPACER) / PRE S |
| 9     | 2966-2971 | CACCTG            | POLYMERASE (SPACER) / PRE S |

| RORE | Position  | Sequence (RGGTCA) | Genome location |
|------|-----------|-------------------|-----------------|
| 1    | 2816-2821 | GGGTCA            | TP              |

**Supplementary Fig.8: Circadian regulatory E-box and RORE motifs in HBV genome (Genotype D, ayw).**

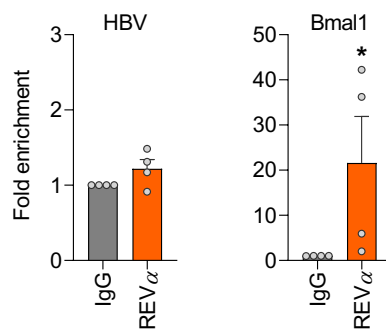

**Supplementary Fig.9: ChIP-qPCR evaluation of REV-ERBα binding HBV DNA.**

Chromatin extracts from HepG2-pEpi cells were immunoprecipitated using antibodies specific for REV-ERBα or rabbit IgG as a negative control. PCR for HBV DNA using primers targeting the RORE or control host gene Bmal1 was performed and %IP data presented relative to the rabbit IgG control shown as the dotted line (mean ± S.E.M., n = 4, Mann–Whitney test, Two-sided). \* denotes p < 0.05. Source data are provided as a Source Data file.

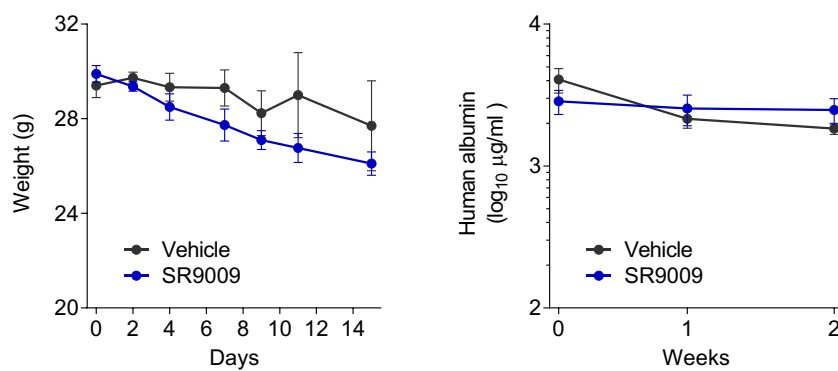

**Supplementary Fig. 10: Effect of REV-ERB agonist SR9009 on HBV infected mice weight and albumin expression.** FRG-NOD mice transplanted with primary human hepatocytes were infected with  $10^9$  HBV genome equivalents and 8 weeks later the mice were treated twice a day by intraperitoneal injection with either vehicle or SR9009 (100 mg/kg) for 2 weeks. Individual animal weights were recorded and peripheral human albumin quantified weekly (mean  $\pm$  S.E.M., n = 3). Source data are provided as a Source Data file.

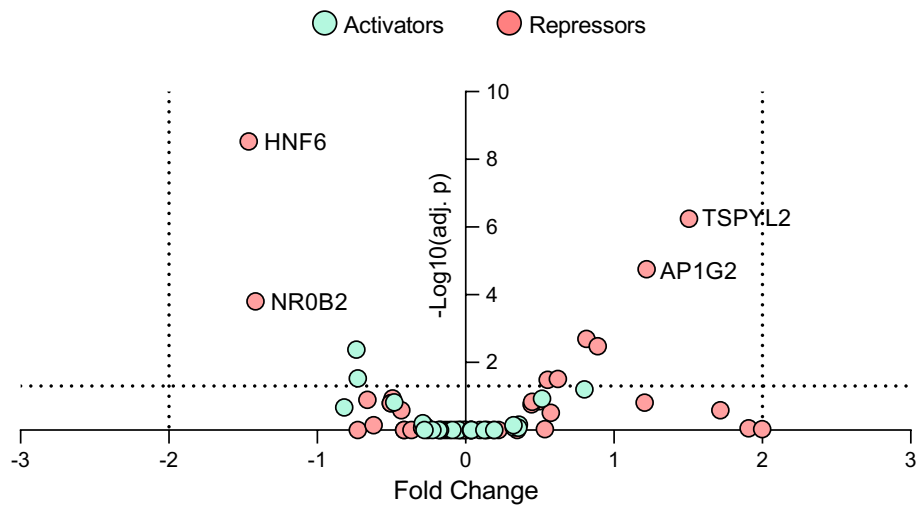

**Supplementary Fig.11: Transcriptomic analysis of REV-ERB agonist SR9009 and vehicle treated chimeric mice.**

Analysis of known activators and repressors of HBV was performed and fold change were plotted against the FDR. Gene names with p value < 0.001 were shown. Fold Change of +/- 2 is deemed statistically significant. Source data are provided as a Source Data file.

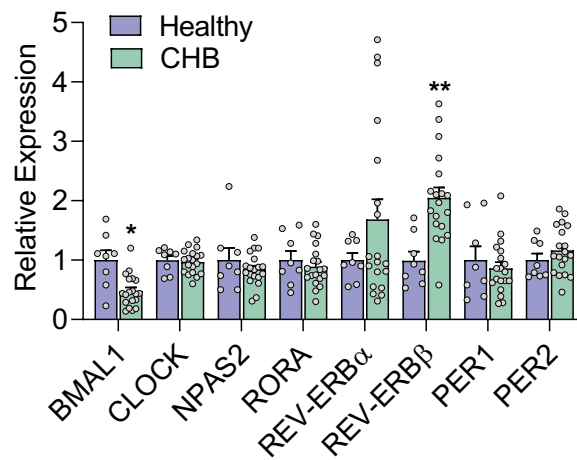

**Supplementary Fig.12: Core clock gene transcripts in chronic hepatitis B and healthy subjects.**

Expression of core clock genes in liver biopsy tissue from healthy (n=8) or hepatitis B virus infected patients classified according to EASL 2017 guidelines in the HBeAg negative phase of disease with chronic hepatitis (n = 19) or chronic infection (n = 8). Data are presented relative to healthy controls, statistics were tested with multiple Mann-Whitney U tests, Two-sided, and p values adjusted with Bonferroni correction (P<0.05 deemed statistically significant). \* denotes p < 0.05, \*\* < 0.01. Source data are provided as a Source Data file.

**Supplementary Table 1: List of primers used**

| <b>Taqman expression assays</b>                                             | <b>Supplier</b>    | <b>Cat #.</b> |
|-----------------------------------------------------------------------------|--------------------|---------------|
| ARNTL (Bmal1) TaqMan® Gene Expression Assay                                 | ThermoFisher       | Hs00154147    |
| NR1D1 (Rev-Erb $\alpha$ ) TaqMan® Gene Expression Assay                     | ThermoFisher       | Hs00253876    |
| SLC10A1 (NTCP) TaqMan® Gene Expression Assay                                | ThermoFisher       | Hs00161820    |
| SCD TaqMan® Gene Expression Assay                                           | ThermoFisher       | Hs01682761    |
| FASN TaqMan® Gene Expression Assay                                          | ThermoFisher       | Hs01005622    |
| HBV-pgRNA TaqMan® Gene Expression Assay                                     | ThermoFisher       | AIKAMSS       |
| b2M Control Mix                                                             | Applied Biosystems | 4325797       |
| <b>qPCR Primers (5'-3')</b>                                                 |                    |               |
| HBV internalization assay DNA forward: ACTCACCAACCTCCTGTCTCT                |                    |               |
| HBV internalization assay DNA reverse: GACAAACGGGCAACATACCT                 |                    |               |
| HBV internalization assay DNA probe: (FAM)-TATCGCTGGATGTGTCTGCGGCGT-(TAMRA) |                    |               |
| PrP forward: TGCTGGGAAGTGCCATGAG                                            |                    |               |
| PrP reverse: CGGTGCATGTTTTACGATAGTA                                         |                    |               |
| rcDNA forward: GTTGCCCGTTTGTCTCTAATTC                                       |                    |               |
| rcDNA reverse: GGAGGGATACATAGAGGTTCTTGA                                     |                    |               |
| cccDNA forward: GCCTATTGATTGGAAAGTATGT                                      |                    |               |
| cccDNA reverse: AGCTGAGGCGGTATCTA                                           |                    |               |
| b2M forward: CTACACTGAATTCACCCCACTG                                         |                    |               |
| b2M reverse: ACCTCCATGATGCTGCTTACATG                                        |                    |               |
| b-Actin forward: CCAACCGCGAGAAGATGA                                         |                    |               |
| b-Actin reverse: CCAGAGGCGTACAGGGATAG                                       |                    |               |
| EGFR forward: AACACCCTGGTCTGGAAGTACG                                        |                    |               |
| EGFR reverse: TCGTTGGACAGCCTTCAAGACC                                        |                    |               |
| <b>ChIP-PCR Primers (5'-3')</b>                                             |                    |               |
| Per1 promoter forward: GTCAAGGAAAATCCCCAGCTTCTG                             |                    |               |
| Per1 promoter reverse: CCAAGATTGGTGACGTAAATGCCA                             |                    |               |
| Bmal1 promoter forward: TTGGGCACAGCGATTGGT                                  |                    |               |
| Bmal1 promoter reverse: GTAAACAGGCACCTCCGTCC                                |                    |               |
| NTCP-Ebox1 forward: AAATCTGTCCCACCTCCACCC                                   |                    |               |
| NTCP-Ebox1 reverse: TGGTTGGAACCTAGGAGGCCTG                                  |                    |               |
| NTCP-Ebox2 forward: ACCCAGCCTCTAGGTTCCAA                                    |                    |               |
| NTCP-Ebox2 reverse: GGGCCACCTAGTGTGTGAGGTT                                  |                    |               |
| NTCP-Ebox3 forward: CACAGCCAGGGTTCTCTCAGGT                                  |                    |               |
| NTCP-Ebox3 reverse: AATACTGGTGGTGGCTGCTCCA                                  |                    |               |
| NTCP-Ebox4 forward: AACCAAAGGCAACACCCAGCTC                                  |                    |               |
| NTCP-Ebox4 reverse: TCCTTTTCCCAGCTCCGCTCTT                                  |                    |               |
| NTCP-Ebox5 forward: AGGAGCTGCAGGGAAGGAGATG                                  |                    |               |
| NTCP-Ebox5 reverse: TGTCACTTTGCTGCTTCTGGGC                                  |                    |               |
| NTCP-RORE1 forward: GCATCCTCTCAGCTCCCAGGAA                                  |                    |               |
| NTCP-RORE1 reverse: AGCTGGGTGTTGCCTTTGGTTC                                  |                    |               |
| NTCP-RORE2 forward: GCCCAGAAGCAGCAAAGTGACA                                  |                    |               |
| NTCP-RORE2 reverse: CCCCAAAGAGGAACAGCCAGA                                   |                    |               |
| HBV-RORE forward: TTACACACTCTATGGAAGGCGG                                    |                    |               |
| HBV-RORE reverse: AAAGATTCTGCCCCATGCTGTA                                    |                    |               |
| HBV-E-box2 forward (680-703): ACTAGTGCCATTTGTTCAAGTGGT                      |                    |               |
| HBV-E-box2 reverse (804-827): ACCCAAAGACAAAAGAAAATTGGT                      |                    |               |
| HBV-E-box3 forward (1168-1188): CAGGTCTGTGCCAAGTGTGTTG                      |                    |               |
| HBV-E-box3 reverse (1278-1299): CAAAACAAGCGGCTAGGAGTTC                      |                    |               |
| HBV-E-box4 forward (1305-1328): AGCAGGTCTGGAGCAAACATTATC                    |                    |               |
| HBV-E-box4 reverse (1413-1434): GGACGTAAACAAAGGACGTCCC                      |                    |               |
| HBV-E-box5 forward (1153-1573): GTCTGTGCCTTCTCATCTGCC                       |                    |               |
| HBV-E-box5 reverse (1630-1652): AGACCTTGGGCAATATTTGGTGG                     |                    |               |
| HBV-E-box6 forward (2294-2317): CTTATAGACCACCAAATGCCCTA                     |                    |               |
| HBV-E-box6 reverse (2396-2414): GGCGATTGAGACCTTCGTC                         |                    |               |
